# Supplementary material for: In silicostructural and functional prediction of African swine fever virus protein-B263R reveals features of a TATA-binding protein
Source: PeerJ journal article supplement (doi:10.7717/peerj.4396), 2018-02-22
Supplement: S1_Table.pdf [file S1_Table.pdf]

**Table S1.** Top ten analogs identified by LOMETS for threading alignment

| Rank | Protein domain Identity | Organism                             | PDB ID | Iden1 (%) <sup>a</sup> | Iden2 (%) <sup>b</sup> | Cov <sup>c</sup> | Norm. Z-score <sup>d</sup> |
|------|-------------------------|--------------------------------------|--------|------------------------|------------------------|------------------|----------------------------|
| 1    | TBP                     | <i>Encephalitozoon cuniculi</i>      | 3eikA  | 14                     | 17                     | 0.67             | 4.01                       |
| 2    | TBP                     | <i>Sulfolobus acidocaldarius</i>     | 1mp9A  | 24                     | 17                     | 0.67             | 1.11                       |
| 3    | TBP                     | <i>Saccharomyces cerevisiae</i>      | 4b0aA  | 16                     | 20                     | 0.74             | 3.98                       |
| 4    | TBP                     | <i>Methanocaldococcus jannaschii</i> | 2z8uA  | 16                     | 13                     | 0.63             | 3.87                       |
| 5    | TBP                     | <i>Pyrococcus woesei</i>             | 1aisA  | 16                     | 15                     | 0.68             | 3.87                       |
| 6    | TBP                     | <i>Sulfolobus acidocaldarius</i>     | 1mp9A  | 12                     | 17                     | 0.73             | 3.64                       |
| 7    | CPSF-100                | <i>Saccharomyces cerevisiae</i>      | 2i7xA  | 15                     | 16                     | 0.90             | 0.53                       |
| 8    | TBP                     | <i>Homo Sapiens</i>                  | 1jfiA  | 13                     | 17                     | 0.65             | 0.67                       |
| 9    | GS                      | <i>Chromohalobacter salexigens</i>   | 5dm3A  | 9                      | 15                     | 0.88             | 0.61                       |
| 10   | TBP                     | <i>Saccharomyces cerevisiae</i>      | 1ytbA  | 27                     | 17                     | 0.67             | 0.62                       |

2

3 a) Iden1 is the percentage sequence identity of the templates in the threading aligned region with the query sequence.

4 b) Iden2 is the percentage sequence identity of the whole template chains with query sequence

5 c) Cov- Represents the coverage of the threading alignment and is equal to the number of aligned residues divided by the length of the  
6 query protein.7 d) Norm. Z-score is the normalized Z-score of the threading alignments. Alignment with a normalized Z-score>1 means a good  
8 alignment and vice versa

- 9 CPSF-100- Cleavage and Polyadenylation Specificity Factor, GS- Glutamate Synthetase, PDB-
- 10 Protein Data Bank TBP- Tata Binding Protein.
