# Supplementary material for: In silicostructural and functional prediction of African swine fever virus protein-B263R reveals features of a TATA-binding protein
Source: PeerJ journal article supplement (doi:10.7717/peerj.4396), 2018-02-22
Supplement: S2_Data.pdf [file S2_Data.pdf]

[Download](#) the residue-specific ligand binding probability, which is estimated by SVM.

[Download](#) the all possible binding ligands and detailed prediction summary.

[Download](#) the templates clustering results.

- (a) **C-score** is the confidence score of the prediction. C-score ranges [0-1], where a higher score indicates a more reliable prediction.  
 (b) **Cluster size** is the total number of templates in a cluster.  
 (c) **Lig Name** is name of possible binding ligand. Click the name to view its information in [the BOLD database](#).  
 (d) **Rep** is a single complex structure with the most representative ligand in the cluster, i.e., the one listed in the **Lig Name** column.  
**Mult** is the complex structures with all potential binding ligands in the cluster.

#### Enzyme Commission (EC) numbers and active sites

| Click to view | Rank | Cscore <sup>EC</sup> | PDB Hit               | TM-score | RMSD <sup>a</sup> | IDEN <sup>b</sup> | Cov   | EC Number                | Active Site Residues |
|---------------|------|----------------------|-----------------------|----------|-------------------|-------------------|-------|--------------------------|----------------------|
|               | 1    | 0.176                | <a href="#">3u55c</a> | 0.513    | 4.61              | 0.045             | 0.753 | <a href="#">2.7.3.3</a>  | NA                   |
|               | 2    | 0.172                | <a href="#">1jw6a</a> | 0.486    | 5.15              | 0.048             | 0.758 | <a href="#">6.3.1.2</a>  | NA                   |
|               | 3    | 0.171                | <a href="#">2qsa5</a> | 0.489    | 4.77              | 0.080             | 0.726 | <a href="#">6.3.1.2</a>  | NA                   |
|               | 4    | 0.170                | <a href="#">2u6ba</a> | 0.493    | 5.02              | 0.052             | 0.781 | <a href="#">1.1.1.34</a> | NA                   |
|               | 5    | 0.169                | <a href="#">1gh4a</a> | 0.504    | 4.74              | 0.050             | 0.758 | <a href="#">2.7.3.2</a>  | NA                   |

Click on the radio buttons to visualize predicted active site residues.

- (a) Cscore<sup>EC</sup> is the confidence score for the EC number prediction. Cscore<sup>EC</sup> values range in between [0-1], where a higher score indicates a more reliable EC number prediction.  
 (b) TM-score is a measure of global structural similarity between query and template protein.  
 (c) RMSD<sup>a</sup> is the RMSD between residues that are structurally aligned by TM-align.  
 (d) IDEN<sup>b</sup> is the percentage sequence identity in the structurally aligned region.  
 (e) Cov represents the coverage of global structural alignment and is equal to the number of structurally aligned residues divided by length of the query protein.

#### Gene Ontology (GO) terms

##### Top 10 homologous GO templates in PDB

| Rank | Cscore <sup>GO</sup> | TM-score | RMSD <sup>a</sup> | IDEN <sup>b</sup> | Cov  | PDB Hit               | Associated GO Terms                                                                                                                                                                                                                                                                                                                                                                                                                                                                                                                                                                                             |
|------|----------------------|----------|-------------------|-------------------|------|-----------------------|-----------------------------------------------------------------------------------------------------------------------------------------------------------------------------------------------------------------------------------------------------------------------------------------------------------------------------------------------------------------------------------------------------------------------------------------------------------------------------------------------------------------------------------------------------------------------------------------------------------------|
| 1    | 0.36                 | 0.7855   | 1.26              | 0.16              | 0.82 | <a href="#">1jw6a</a> | <a href="#">GO:0001748</a> <a href="#">GO:0005500</a> <a href="#">GO:006366</a> <a href="#">GO:0043565</a> <a href="#">GO:005488</a> <a href="#">GO:0070898</a> <a href="#">GO:0070893</a> <a href="#">GO:0005654</a> <a href="#">GO:0070860</a> <a href="#">GO:0003682</a> <a href="#">GO:0006360</a> <a href="#">GO:0008301</a> <a href="#">GO:0051123</a> <a href="#">GO:0003677</a> <a href="#">GO:0005634</a> <a href="#">GO:0006368</a> <a href="#">GO:0005669</a> <a href="#">GO:0006351</a> <a href="#">GO:0006356</a> <a href="#">GO:0006367</a> <a href="#">GO:0005515</a> <a href="#">GO:0003702</a> |
| 2    | 0.30                 | 0.7808   | 1.32              | 0.16              | 0.82 | <a href="#">2u6ba</a> | <a href="#">GO:0003700</a> <a href="#">GO:0006355</a> <a href="#">GO:0006413</a> <a href="#">GO:0003677</a> <a href="#">GO:0005488</a> <a href="#">GO:0006367</a>                                                                                                                                                                                                                                                                                                                                                                                                                                               |
| 3    | 0.29                 | 0.7899   | 1.29              | 0.12              | 0.82 | <a href="#">1jw6c</a> | <a href="#">GO:0003677</a> <a href="#">GO:0005488</a> <a href="#">GO:0006355</a> <a href="#">GO:0006367</a>                                                                                                                                                                                                                                                                                                                                                                                                                                                                                                     |
| 4    | 0.28                 | 0.7854   | 1.42              | 0.15              | 0.83 | <a href="#">1jw6a</a> | <a href="#">GO:0005515</a> <a href="#">GO:0006351</a> <a href="#">GO:0003677</a> <a href="#">GO:0006355</a> <a href="#">GO:0005634</a> <a href="#">GO:0006367</a> <a href="#">GO:0003702</a> <a href="#">GO:0005488</a>                                                                                                                                                                                                                                                                                                                                                                                         |
| 5    | 0.28                 | 0.7206   | 1.87              | 0.17              | 0.79 | <a href="#">2u6ba</a> | <a href="#">GO:0006355</a> <a href="#">GO:0003677</a> <a href="#">GO:0006351</a> <a href="#">GO:0005488</a> <a href="#">GO:0006367</a>                                                                                                                                                                                                                                                                                                                                                                                                                                                                          |
| 6    | 0.27                 | 0.7796   | 2.13              | 0.13              | 0.80 | <a href="#">1jw6a</a> | <a href="#">GO:0006355</a> <a href="#">GO:0003677</a> <a href="#">GO:0006351</a> <a href="#">GO:0005488</a> <a href="#">GO:0006367</a>                                                                                                                                                                                                                                                                                                                                                                                                                                                                          |
| 7    | 0.27                 | 0.7415   | 1.96              | 0.17              | 0.82 | <a href="#">1jw6a</a> | <a href="#">GO:0006367</a> <a href="#">GO:0003677</a> <a href="#">GO:0006355</a> <a href="#">GO:0003702</a> <a href="#">GO:0005488</a> <a href="#">GO:0006351</a>                                                                                                                                                                                                                                                                                                                                                                                                                                               |
| 8    | 0.17                 | 0.5110   | 4.64              | 0.05              | 0.75 | <a href="#">2u6ba</a> | <a href="#">GO:0001656</a> <a href="#">GO:0016772</a> <a href="#">GO:0016310</a> <a href="#">GO:0016301</a> <a href="#">GO:0005524</a> <a href="#">GO:0003824</a> <a href="#">GO:0016740</a>                                                                                                                                                                                                                                                                                                                                                                                                                    |
| 9    | 0.17                 | 0.4926   | 5.02              | 0.05              | 0.78 | <a href="#">2u6ba</a> | <a href="#">GO:0004420</a> <a href="#">GO:0005789</a> <a href="#">GO:0008298</a> <a href="#">GO:0015936</a> <a href="#">GO:0016021</a> <a href="#">GO:0016616</a> <a href="#">GO:0005061</a> <a href="#">GO:0005062</a> <a href="#">GO:0005114</a>                                                                                                                                                                                                                                                                                                                                                              |
| 10   | 0.17                 | 0.5058   | 4.59              | 0.06              | 0.74 | <a href="#">1gh4a</a> | <a href="#">GO:0005524</a> <a href="#">GO:0005737</a> <a href="#">GO:0016310</a> <a href="#">GO:0046314</a> <a href="#">GO:0016740</a> <a href="#">GO:0016301</a> <a href="#">GO:0004111</a> <a href="#">GO:0001656</a> <a href="#">GO:0003824</a> <a href="#">GO:0016772</a> <a href="#">GO:0003644</a> <a href="#">GO:0034641</a> <a href="#">GO:0006600</a> <a href="#">GO:0005739</a> <a href="#">GO:0007420</a> <a href="#">GO:0005829</a>                                                                                                                                                                 |

##### Consensus prediction of GO terms

| Molecular Function | <a href="#">GO:0008135</a> | <a href="#">GO:0001071</a> | <a href="#">GO:0003702</a> | <a href="#">GO:0005515</a> | <a href="#">GO:0043565</a> | <a href="#">GO:0003682</a> | <a href="#">GO:0008301</a> |
|--------------------|----------------------------|----------------------------|----------------------------|----------------------------|----------------------------|----------------------------|----------------------------|
| <b>GO-Score</b>    | 0.59                       | 0.59                       | 0.54                       | 0.54                       | 0.36                       | 0.36                       | 0.36                       |
| Biological Process | <a href="#">GO:0006355</a> | <a href="#">GO:0044267</a> | <a href="#">GO:0006360</a> | <a href="#">GO:0051123</a> | <a href="#">GO:0070898</a> | <a href="#">GO:0070893</a> | <a href="#">GO:0070893</a> |
| <b>GO-Score</b>    | 0.83                       | 0.53                       | 0.36                       | 0.36                       | 0.36                       | 0.36                       | 0.36                       |
| Cellular Component | <a href="#">GO:0000250</a> | <a href="#">GO:0005662</a> | <a href="#">GO:0000126</a> | <a href="#">GO:0070860</a> |                            |                            |                            |
| <b>GO-Score</b>    | 0.36                       | 0.36                       | 0.36                       | 0.36                       |                            |                            |                            |

- (a) Cscore<sup>GO</sup> is a combined measure for evaluating global and local similarity between query and template protein. It's range is [0-1] and higher values indicate more confident predictions.  
 (b) TM-score is a measure of global structural similarity between query and template protein.  
 (c) RMSD<sup>a</sup> is the RMSD between residues that are structurally aligned by TM-align.  
 (d) IDEN<sup>b</sup> is the percentage sequence identity in the structurally aligned region.  
 (e) Cov represents the coverage of global structural alignment and is equal to the number of structurally aligned residues divided by length of the query protein.  
 (f) The second table shows a consensus GO terms amongst the top scoring templates. The GO-score associated with each prediction is defined as the average weight of the GO term, where the weights are assigned based on Cscore<sup>GO</sup> of the template.

(Click on [S313700\\_results.tar.bz2](#) to download the tarball file including all modeling results listed on this page)

Please cite the following articles when you use the I-TASSER server:

- J Yang, R Yan, A Roy, D Xu, J Poisson, Y Zhang, The I-TASSER Suite: Protein structure and function prediction. *Nature Methods*, 12: 7-8, 2015.
- J Yang, Y Zhang, I-TASSER server: new development for protein structure and function predictions. *Nucleic Acids Research*, 43: W174-W181, 2015.
- A Roy, A Kucukural, Y Zhang, I-TASSER: a unified platform for automated protein structure and function prediction. *Nature Protocols*, 5: 725-738, 2010.
- Y Zhang, I-TASSER server for protein 3D structure prediction. *BMC Bioinformatics*, 9: 40, 2008.
