# Supplementary material for: In silicostructural and functional prediction of African swine fever virus protein-B263R reveals features of a TATA-binding protein
Source: PeerJ journal article supplement (doi:10.7717/peerj.4396), 2018-02-22

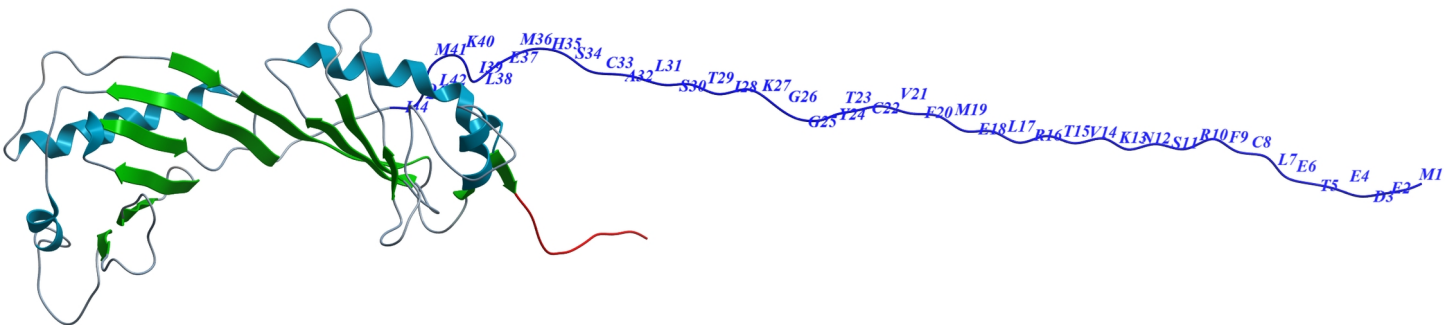

Supplement: S2_Figure.pdf [file S2_Figure.pdf]
