# Supplementary material for: In silicostructural and functional prediction of African swine fever virus protein-B263R reveals features of a TATA-binding protein
Source: PeerJ journal article supplement (doi:10.7717/peerj.4396), 2018-02-22
Supplement: S2_Table.pdf [file S2_Table.pdf]

1 **Table S2 Consensus prediction of GO terms**

2

| <b>Molecular Function</b>                                                            | <b>Go-Score</b> | <b>Biological Process</b>                                                 | <b>Go-Score</b> | <b>Cellular Component</b>                               | <b>Go-Score</b> |
|--------------------------------------------------------------------------------------|-----------------|---------------------------------------------------------------------------|-----------------|---------------------------------------------------------|-----------------|
| GO:0003677-<br>DNA Binding                                                           | 0.78            | GO:0006367-<br>Transcription<br>Initiation from<br>RNA pol II<br>promoter | 0.78            | GO:0016591 DNA<br>directed RNA Pol II,<br>holoenzyme    | 0.52            |
| GO:0008135-<br>Translation Factor<br>Activity/Nucleic<br>Acid binding                | 0.52            | GO:0006355-<br>regulation of<br>Transcription,<br>DNA dependent           | 0.78            | GO:0000120 RNA pol I<br>transcription factor<br>complex | 0.52            |
| GO:0001071-<br>Nucleic acid<br>binding<br>activity/Transcripti<br>on factor activity | 0.52            | GO:0032196<br>Transpos<br>ition                                           | 0.52            | -                                                       | -               |
| GO:0003702 RNA<br>pol II transcription<br>activity                                   | 0.45            | GO:0006384<br>Transcription<br>Initiation from<br>RNA pol III<br>promoter | 0.52            | -                                                       | -               |
| GO:0005515<br>Protein binding                                                        | 0.45            | GO:0070897<br>DNA dependent<br>transcriptional<br>PIC assembly            | 0.52            | -                                                       | -               |
| -                                                                                    | -               | GO:0044267-<br>Cellular protein<br>metabolic<br>process                   | 0.47            | -                                                       | -               |

3
