# Supplementary material for: In silicostructural and functional prediction of African swine fever virus protein-B263R reveals features of a TATA-binding protein
Source: PeerJ journal article supplement (doi:10.7717/peerj.4396), 2018-02-22
Supplement: S3_Data.pdf [file S3_Data.pdf]

# S3 Data. TM-site results of the complete pB263R model.

[\[Back to COACH server\]](#)

## COACH results for job CH037519

[Download the submitted query structure file](#)

### COACH Results

[Hide](#)

| Click to view                    | Rank | C-score | Cluster size | PDB Hit               | Lig Name                 | Download Complex                           | Consensus Binding Residues                                                  |
|----------------------------------|------|---------|--------------|-----------------------|--------------------------|--------------------------------------------|-----------------------------------------------------------------------------|
| <input checked="" type="radio"/> | 1    | 0.26    | 32           | <a href="#">1qn4A</a> | <a href="#">Nuc.Acid</a> | <a href="#">Rep</a> , <a href="#">Mult</a> | 52,54,90,91,108,110,113,115,117,157,158,160,200,201,205,207,217,219,229,232 |
| <input type="radio"/>            | 2    | 0.24    | 29           | <a href="#">1qn6A</a> | <a href="#">Nuc.Acid</a> | <a href="#">Rep</a> , <a href="#">Mult</a> | 49,50,52,89,90,95,98,104,106,108,119,120,160,201,202,219,221,223,225,227    |
| <input type="radio"/>            | 3    | 0.02    | 2            | <a href="#">5iy8P</a> | <a href="#">Nuc.Acid</a> | <a href="#">Rep</a> , <a href="#">Mult</a> | 50,97,108,119,202,219,221,223,225,227                                       |
| <input type="radio"/>            | 4    | 0.01    | 1            | <a href="#">1clqA</a> | <a href="#">CA</a>       | N/A                                        | 52,54,78                                                                    |
| <input type="radio"/>            | 5    | 0.01    | 1            | <a href="#">3ju5C</a> | <a href="#">MG</a>       | N/A                                        | 45,73,79                                                                    |
| <input type="radio"/>            | 6    | 0.01    | 1            | N/A                   | N/A                      | N/A                                        | 52,117,119                                                                  |
| <input type="radio"/>            | 7    | 0.01    | 1            | <a href="#">3shyA</a> | <a href="#">MG</a>       | N/A                                        | 57,102                                                                      |
| <input type="radio"/>            | 8    | 0.01    | 2            | <a href="#">2b3zA</a> | <a href="#">ZN</a>       | N/A                                        | 35,53,59                                                                    |
| <input type="radio"/>            | 9    | 0.01    | 1            | <a href="#">2l0oA</a> | <a href="#">ZN</a>       | N/A                                        | 150,153                                                                     |
| <input type="radio"/>            | 10   | 0.01    | 1            | <a href="#">1frvB</a> | <a href="#">F3S</a>      | N/A                                        | 155,164                                                                     |

[Download](#) the residue-specific binding probability, which is estimated by SVM.

[Download](#) the predicted bound ligands and detailed prediction summary.

[Download](#) the templates clustering results.

- (a) **C-score** is the confidence score of the prediction. C-score ranges [0-1], where a higher score indicates a more reliable prediction.  
(b) **Cluster size** is the total number of templates in a cluster.  
(c) **Lig Name** is the name of possible binding ligand. Click the ligand name to view its information in [the Biol\\_IP database](#).  
(d) **Rep** is a single complex structure with the most representative ligand in the cluster, i.e., the one listed in the **Lig Name** column.  
**Mult** is the complex structures with all potential binding ligands in the cluster.

Spin On/Off   Spin On/Off

### TM-SITE Results

[Hide](#)

| Click to view                               | Rank | C-score <sup>a</sup> | Cluster size <sup>b</sup> | Rep Templ <sup>c</sup>                                                          | Mult Templ <sup>d</sup> | Ligands <sup>e</sup> | Predicted binding site residues                                             |
|---------------------------------------------|------|----------------------|---------------------------|---------------------------------------------------------------------------------|-------------------------|----------------------|-----------------------------------------------------------------------------|
| <input type="radio"/> <input type="radio"/> | 1    | 0.39                 | 32                        | <a href="#">1qn4A_BS01_NUC</a> <a href="#">Download</a> <a href="#">NUC(32)</a> |                         |                      | 52,54,90,91,108,110,113,115,117,157,158,160,200,201,205,207,217,219,229,232 |
| <input type="radio"/> <input type="radio"/> | 2    | 0.37                 | 27                        | <a href="#">1qn4A_BS02_NUC</a> <a href="#">Download</a> <a href="#">NUC(27)</a> |                         |                      | 49,50,52,89,90,95,98,104,106,108,119,120,160,201,202,219,221,223,225,227    |
| <input type="radio"/> <input type="radio"/> | 3    | 0.19                 | 3                         | <a href="#">5mfQ_BS02_NUC</a> <a href="#">Download</a> <a href="#">NUC(3)</a>   |                         |                      | 49,50,88,89,90,91,93,95,97,104,106,108,110,119,120,122,201,202,221,223,225  |
| <input type="radio"/> <input type="radio"/> | 4    | 0.16                 | 1                         | <a href="#">5fz5O_BS01_NUC</a> <a href="#">Download</a> <a href="#">NUC(1)</a>  |                         |                      | 52,54,60,90,110,112,115,117,158,201,229                                     |
| <input type="radio"/> <input type="radio"/> | 5    | 0.16                 | 1                         | <a href="#">5fz5O_BS02_NUC</a> <a href="#">Download</a> <a href="#">NUC(1)</a>  |                         |                      | 49,50,52,89,90,95,99,106,108,119,202                                        |

(a) **C-score** is the confidence score of predicted binding site. C-score ranges [0-1], where a higher score indicates a more reliable prediction.

(b) **Cluster size** is the number of templates in a cluster.

(c) **Rep Templ** presents a representative ligand-protein template from a cluster. The template names are: (PDBIDchain)\_(BioLiP site #)\_(Ligand ID). Click the corresponding template to download the structure.

(d) **Mult Templ** provides all ligand-protein complex structures in a cluster, where each ligand is separated by "TER".

(e) **Ligands** lists all ligands in a cluster. The numbers in the parentheses are the appearing times of the corresponding ligands. Click the ligand name to visualize its detailed information in BioLiP.

Spin On/Off  Spin On/Off

| Click to view                               | Rank | C-score <sup>a</sup> | Cluster size <sup>b</sup> | Templates <sup>c</sup> | Ligands <sup>d</sup>                           | Predicted binding site residues |
|---------------------------------------------|------|----------------------|---------------------------|------------------------|------------------------------------------------|---------------------------------|
| <input type="radio"/> <input type="radio"/> | 1    | 0.18                 | 2                         | <a href="#">List</a>   | <a href="#">MG(1)</a> , <a href="#">ZN(1)</a>  | 30,35,53,59,64                  |
| <input type="radio"/> <input type="radio"/> | 2    | 0.18                 | 2                         | <a href="#">List</a>   | <a href="#">F3S(1)</a> , <a href="#">ZN(1)</a> | 35,37,53,59,155,164             |
| <input type="radio"/> <input type="radio"/> | 3    | 0.17                 | 2                         | <a href="#">List</a>   | <a href="#">MG(1)</a> , <a href="#">CA(1)</a>  | 52,54,57,78,102                 |
| <input type="radio"/> <input type="radio"/> | 4    | 0.15                 | 1                         | <a href="#">List</a>   | <a href="#">MG(1)</a>                          | 1,3                             |
| <input type="radio"/> <input type="radio"/> | 5    | 0.15                 | 1                         | <a href="#">List</a>   | <a href="#">ZN(1)</a>                          | 150,153                         |

(a) **C-score** is the confidence score of predicted binding site. C-score ranges [0-1], where a higher score indicates a more reliable prediction.

(b) **Cluster size** is the number of templates in a cluster.

(c) **Templates** presents the list of templates in a cluster. The template names are: (PDBIDchain)\_(BioLiP site #)\_(Ligand ID). Click the corresponding template to search the BioLiP database. When the number of templates is >5, click "show all templates" to get the list of all templates in the cluster

(d) **Ligands** lists ligands in a cluster. The numbers in the parentheses are the appearing times for the corresponding ligands. Click the ligand name to visualize its detailed information in BioLiP.

Spin On/Off  Spin On/Off

| Click to view         | Rank | C-score <sup>a</sup> | PDB Hit               | TM-score | RMSD <sup>b</sup> | IDEN <sup>c</sup> | Cov <sup>d</sup> | BS-score <sup>e</sup> | Lig. Name | Download Complex         | Predicted binding site residues                                                 |
|-----------------------|------|----------------------|-----------------------|----------|-------------------|-------------------|------------------|-----------------------|-----------|--------------------------|---------------------------------------------------------------------------------|
| <input type="radio"/> | 1    | 0.08                 | <a href="#">1ytbA</a> | 0.655    | 1.32              | 0.167             | 0.684            | 0.65                  | Nuc.Acids | <a href="#">Download</a> | 89,90,95,97,106,108,110,112,115,117,119,157,158,160,217,219,221,225,227,229,230 |
| <input type="radio"/> | 2    | 0.01                 | <a href="#">5fmfQ</a> | 0.655    | 1.31              | 0.167             | 0.684            | 0.57                  | Nuc.Acids | <a href="#">Download</a> | 117,157,158,208,219,229,232                                                     |

- (a) **C-score** is the confidence score of predicted binding site. C-score values range in between [0-1]; where a higher score indicates a more reliable prediction.
- (b) **RMSD** the RMSD between residues that are structurally aligned by TM-align.
- (c) **IDEN** is the percentage sequence identity in the structurally aligned region.
- (d) **Cov** represents the coverage of global structural alignment and is equal to the number of structurally aligned residues divided by length of the query protein.
- (e) **BS-score** is a measure of local similarity (sequence & structure) between template binding site and predicted binding site in the query structure. Based on large scale benchmarking analysis, we have observed that a BS-score >1 reflects a significant local match between the predicted and template binding site.

Spin On/Off  Spin On/Off

### FINDSITE Results

[Hide](#)

No binding site was predicted by FINDSITE.

### ConCavity Results

[Hide](#)

| Click to view         | Rank | C-score | Predicted binding residues |
|-----------------------|------|---------|----------------------------|
| <input type="radio"/> | 1    | 0.14    | 52,117,119                 |
| <input type="radio"/> | 2    | 0.12    | 201,205,219,227            |
| <input type="radio"/> | 3    | 0.12    | 63,84,85,86,87,89,90,92,95 |

Spin On/Off  Spin On/Off

Please cite the following articles when you use the COACH server:

1. Jianyi Yang, Amrishi Roy and Yang Zhang, *Protein-ligand binding site recognition using complementary binding-specific substructure comparison and sequence profile alignment*, Bioinformatics, 29: 2588-2595 (2013) ([download the PDF file](#))
2. Jianyi Yang, Amrishi Roy and Yang Zhang, *BioLIP: a semi-manually curated database for biologically relevant ligand-protein interactions.*, Nucleic Acids Research, 41: D1096-D1103 (2013) ([download the PDF file](#)).
