# Supplementary material for: In silicostructural and functional prediction of African swine fever virus protein-B263R reveals features of a TATA-binding protein
Source: PeerJ journal article supplement (doi:10.7717/peerj.4396), 2018-02-22
Supplement: S3_Table.pdf [file S3_Table.pdf]

**Table S3.** TBP sequences used for phylogeny analysis.

| <b>Tata Binding Proteins</b>   |                                                                                      |              |                                                   |
|--------------------------------|--------------------------------------------------------------------------------------|--------------|---------------------------------------------------|
|                                | Description                                                                          | Accession    | Organism                                          |
| <b>pB263R Isolate</b>          |                                                                                      |              |                                                   |
| pB263R Ba71v                   | Uncharacterized protein B263R-Ba71v isolate                                          | Q65175       | <i>African swine fever virus</i>                  |
| <b>NCDLVs</b>                  |                                                                                      |              |                                                   |
| Apm TBP                        | TATA-box-binding protein-like                                                        | NC_014649.1  | <i>Acanthamoeba polyphaga mimivirus</i>           |
| Hav  Putative TBP              | Putative TATA-box-binding protein                                                    | KX008963.1   | <i>Heterosigma akashiwo virus</i>                 |
| Mv TBP                         | TATA-box-binding protein-like protein                                                | AEX61565     | <i>Megavirus courdo7</i>                          |
| Ylpv A Putative TBP            | putative TATA box binding protein                                                    | YP_009174782 | <i>Yellowstone lake phycodnavirus 1</i>           |
| Ylpv B Putative TBP            | putative TATA box binding protein                                                    | NC_028108.1  | <i>Yellowstone lake phycodnavirus 3</i>           |
| Pbcv  TFIID/TBP1               | transcription factor TFIID (or TATA-binding protein TBP)                             | AGE48549     | <i>Paramecium bursaria Chlorella virus AN69C</i>  |
| Pbcv  TFIID/TBP2               | transcription factor TFIID (or TATA-binding protein TBP)                             | AGE48777     | <i>Paramecium bursaria Chlorella virus AP110A</i> |
| Atcv  TFIID/TBP                | Transcription factor TFIID (Or TATA-binding protein TBP)                             | AGE56691     | <i>Acanthocystis turfacea Chlorella virus</i>     |
| <b>Archaea, Eukaryotes TBP</b> |                                                                                      |              |                                                   |
| Sc 1ytb_A TBP                  | TATA-binding protein                                                                 | AEP68421     | <i>Saccharomyces cerevisiae</i>                   |
| Sc 4b0a_A TIF TFIID1           | Yeast TATA-binding protein-yeast TAF1                                                | 4B0A_A       | <i>Saccharomyces cerevisiae</i>                   |
| Sc 1rm1_A TFIIA TBP            | TATA-binding protein                                                                 | NP_011075.1  | <i>Saccharomyces cerevisiae</i>                   |
| Sc TBP                         | TATA-binding protein                                                                 | NP_011075.0  | <i>Saccharomyces cerevisiae S288c</i>             |
| At TBP2                        | TATA binding protein 2                                                               | NP_175948    | <i>Arabidopsis thaliana</i>                       |
| me  cd04516 TBP                | TATA binding protein                                                                 | OAQ30812     | <i>Mortierella elongata AG-77</i>                 |
| At TBP1                        | TATA binding protein 1                                                               | NP_187953    | <i>Arabidopsis thaliana</i>                       |
| At TBP CTD                     | Chain E, Co-Crystal Structure Of Tbp Recognizing The Minor Groove Of A Tata Element. | 1VTL_E       | <i>Arabidopsis thaliana</i>                       |
| At TBP1                        | TATA binding protein 1                                                               | NP_187953    | <i>Arabidopsis thaliana</i>                       |
| Ec TBP                         | Chain C, Crystal Structure Of The Mot1 N-Terminal Domain In Complex With Tbp         | 3OC3_C       | <i>Encephalitozoon cuniculi</i>                   |

|                      |                                                      |                        |                                              |
|----------------------|------------------------------------------------------|------------------------|----------------------------------------------|
| In TLF-Iso X1        | TATA-box-binding protein-like isoform X1             | XP_019186975           | <i>Ipomoea nil</i>                           |
| Ce TBP-1             | TATA-box-binding protein                             | NP_498635              | <i>Caenorhabditis elegans</i>                |
| Mmus TRF3            | TATA box-binding protein-like protein 2 isoform 1    | NP_951014<br>XP_140875 | <i>Mus musculus</i>                          |
| Dm TBP               | TATA binding protein                                 | NP_523805              | <i>Drosophila melanogaster</i>               |
| Dm TRF               | TBP-related factor                                   | NP_476939              | <i>Drosophila melanogaster</i>               |
| Hs TBP2              | TATA box-binding protein                             | 2119243A               | <i>Homo sapiens</i>                          |
| Hs TL                | TATA box-binding protein-like protein 1              | NP_004856              | <i>Homo sapiens</i>                          |
| Hs  5iyb P TBP       | TATA-box-binding protein isoform 2                   | NP_001165556           | <i>Homo sapiens</i>                          |
| Hs TBP               | TATA-box-binding protein isoform 1                   | NP_003185              | <i>Homo sapiens</i>                          |
| mv Cd00652 TBP TLF   | TATA-box-binding protein                             | KFH70047               | <i>Mortierella verticillata</i><br>NRRL 6337 |
| Ce TLF-1             | TBP-Like Factor                                      | NP_492356              | <i>Caenorhabditis elegans</i>                |
| agl Cd04517 TLF TBPL | PREDICTED: TATA box-binding protein-like protein 1   | XP_018577452           | <i>Anoplophora glabripennis</i>              |
| Hs TLP2              | TATA box-binding protein-like protein 2              | NP_950248              | <i>Homo sapiens</i>                          |
| Dm TRF-IsoJ          | TATA box binding protein-related factor 2, isoform J | NP_511084              | <i>Drosophila melanogaster</i>               |
| Dm TRF-IsoH          | TATA box binding protein-related factor 2, isoform H | NP_996377              | <i>Drosophila melanogaster</i>               |
| Sa 1mp9A TBP TF      | TATA sequence-binding protein                        | Q9UWN7                 | <i>Sulfolobus acidocaldarius</i>             |
| Sa TBP CTD           | TATA-box-binding protein                             | WP_011278173           | <i>Sulfolobus acidocaldarius</i>             |
| SsP2 TFIID           | TATA box binding protein, hypothetical (tfIID)       | AAK41225               | <i>Sulfolobus solfataricus</i> P2            |
| mk TF                | transcription factor                                 | WP_011019207           | <i>Methanopyrus kandleri</i><br>AV19         |
| sp TBP               | TATA-binding protein (TBP)                           | NP_594566              | <i>Schizosaccharomyces pombe</i>             |
| Ap TFIID TBP         | transcription factor IID TBP                         | NP_148219              | <i>Aeropyrum pernix</i> K1                   |
| Tp TBP               | TATA box-binding protein                             | WP_011751968           | <i>Thermofilum pendens</i>                   |
| Ckc TFP              | Archaeal TATA-box-binding family protein             | WP_012310109           | <i>Candidatus Korarchaeum cryptofilum</i>    |
| Nm TFP               | TATA-box binding family protein                      | ABX13415               | <i>Nitrosopumilus maritimus</i><br>SCM1      |
| Pa TF                | transcription factor TATA-box-binding protein        | WP_011008464           | <i>Pyrobaculum aerophilum</i>                |
| pw 1ais A TBP        | Chain A, Tata-Binding Protein TRANSCRIPTION FACTOR   | 1AIS_A                 | <i>Pyrococcus woesei</i>                     |
| pw d1aisa2 TBP CTD   | TATA-box-binding protein                             | WP_014734019           | <i>Pyrococcus woesei</i>                     |
| ph TFP               | TATA box binding protein (TBP) Transcription Factor  | WP_010885095           | <i>Pyrococcus horikoshii</i>                 |
| pw d1aisa1  TBP      | Chain A, Tata-Binding Protein                        | 1D3U_A                 | <i>Pyrococcus woesei</i>                     |

---

| CTD                  | TRANSCRIPTION FACTOR                              |              |                                                   |
|----------------------|---------------------------------------------------|--------------|---------------------------------------------------|
| sa 1mp9_A  TBP<br>TF | Chain A, Tbp From A<br>Mesothermophilic Archaeon, | 1MP9_A       | <i>Sulfolobus acidocaldarius</i>                  |
| mj TBP               | TATA-box-binding protein                          | WP_048202361 | <i>Methanocaldococcus<br/>jannaschii</i>          |
| mk TF                | TATA-box-binding protein-TF                       | Q8TX38       | <i>methanopyrus kandleri</i>                      |
| ta TFIID             | transcription factor TFIID TBP                    | WP_010900626 | <i>Thermoplasma<br/>acidophilum DSM 1728</i>      |
| mj 2z8u A TBP        | Chain A TBP                                       | 2Z8U_A       | <i>Methanocaldococcus<br/>jannaschii</i>          |
| mj TFIID             | TATA-box-binding protein                          | Q57930       | <i>Methanocaldococcus<br/>jannaschii</i>          |
| archeal TBP          | TATA-box-binding protein                          | WP_070364144 | <i>Multispecies unclassified<br/>Halobacteria</i> |
| af TF                | transcription factor                              | WP_010877880 | <i>Archaeoglobus fulgidus</i>                     |
| hv  TB TIF           | TATA-binding transcription<br>initiation factor   | WP_004045271 | <i>Haloferax volcanii</i>                         |
| mmaz TF              | Archaeal TATA box binding<br>protein (TBP)        | WP_011032977 | <i>Methanosarcina mazei<br/>Go1</i>               |
| mmaz  TF B           | Transcription factor TF TBP                       | WP_011034115 | <i>Methanosarcina mazei<br/>Go1</i>               |

---
